# Supplementary figures and images for: Co(ii) molecular complexes as a reference for the spin crossover in Fe(ii) analogues
Source: Royal Society of Chemistry journal article supplement (doi:10.1039/b202610d), 2002-01-01

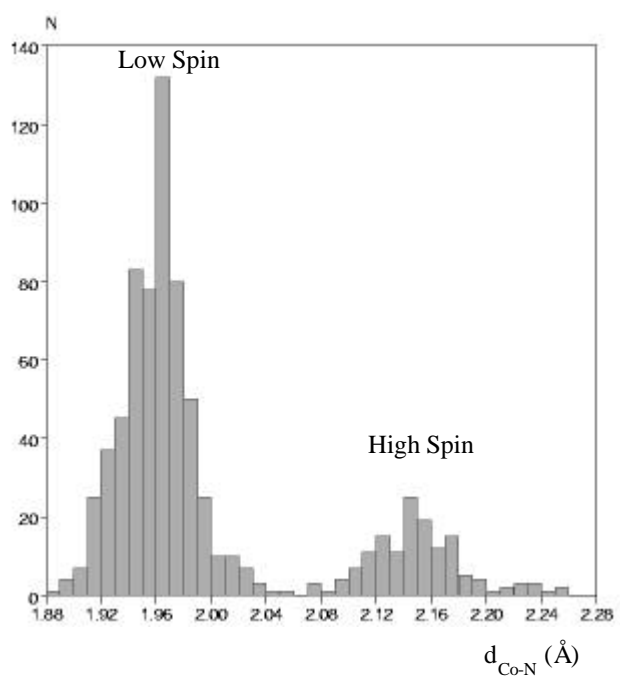

Supplement: b202610d.pdf [file b202610d.pdf]
